# Supplementary material
Source: PubMed Central journal article supplement (PMC4809194)
Supplement: NIHMS31165-supplement-01.pdf [file NIHMS31165-supplement-01.pdf]

**Supplementary Table 1.** Summary of the disaccharide analysis of *N*-sulfo heparosan and *N*-sulfo heparosan 6-*O*-sulfate

| Disaccharides | <i>N</i> -sulfo heparosan<br>( <i>mol/mol</i> %) | <i>N</i> -sulfo heparosan 6- <i>O</i> -sulfate<br>( <i>mol/mol</i> %) |
|---------------|--------------------------------------------------|-----------------------------------------------------------------------|
| ΔUA-GlcNAc    | 24.4%                                            | 4.6%                                                                  |
| ΔUA-GlcNS     | 75.6%                                            | 10.4%                                                                 |
| ΔUA-GlcNAc6S  | N.D.                                             | 14.6%                                                                 |
| ΔUA-GlcNS6S   | N.D.                                             | 70.4%                                                                 |

### Supplementary Figure 1

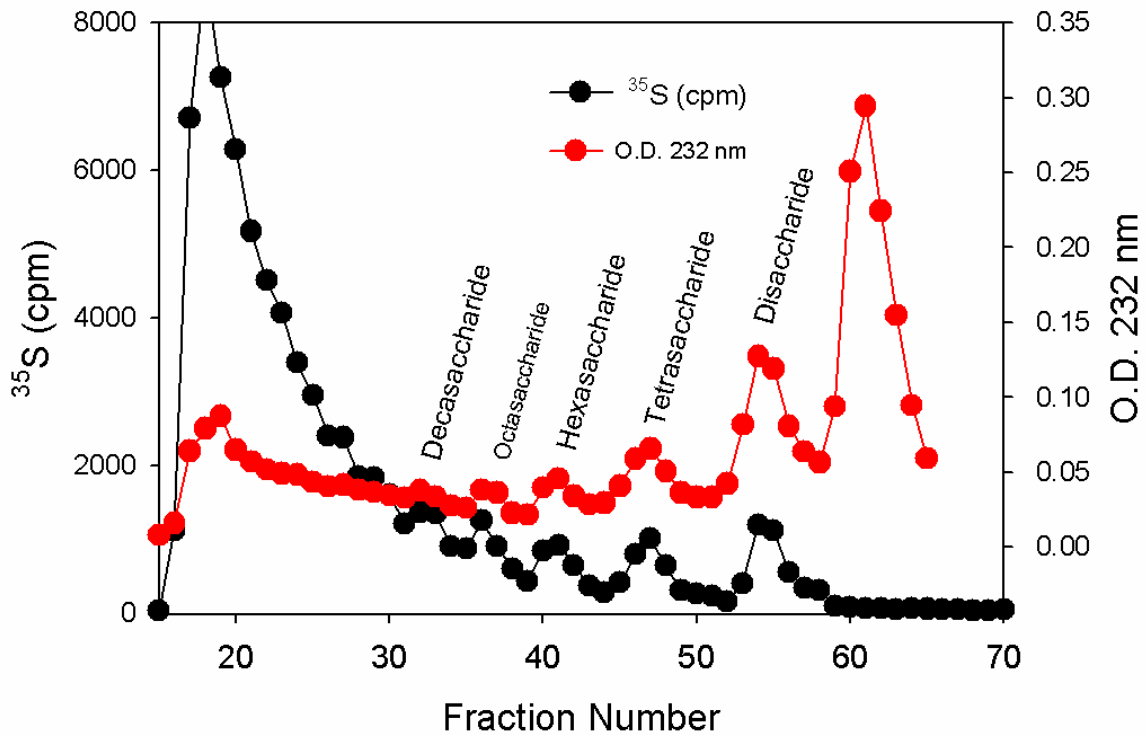

**Supplementary Figure 1. Elution profiles of *N*-[ $^{35}\text{S}$ ]sulfo heparosan oligosaccharides on BioGel P-10.** Low specific [ $^{35}\text{S}$ ]radioactively labeled *N*-[ $^{35}\text{S}$ ]sulfo heparosan ( $1.5 \times 10^6$  cpm/mg) was prepared by incubating deacetylated heparosan with purified NST and [ $^{35}\text{S}$ ]PAPS. The polysaccharide (1 mg) was digested with 20 ng of purified heparin lyase III. The products were fractionated on a BioGel P-10 column, which was eluted with a buffer containing 25 mM Tris, 1000 mM NaCl, pH 7.4. The fractions were monitored by both [ $^{35}\text{S}$ ]radioactivity and UV 232 nm. The fractions containing the oligosaccharides with the desired size were pooled for further analysis.

**Supplementary Figure 2**

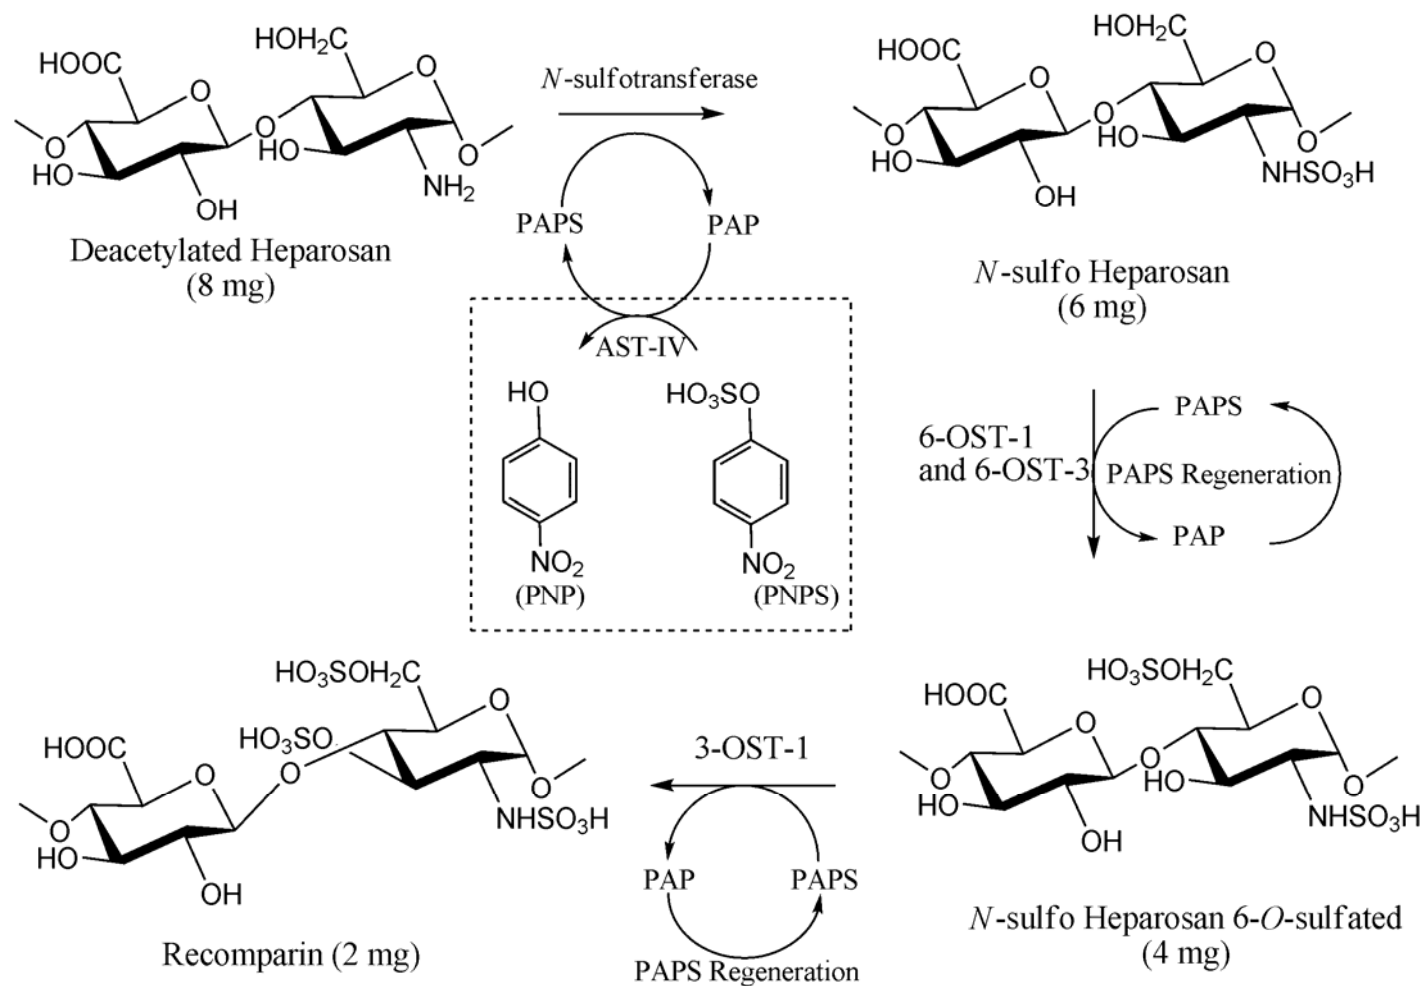

**Supplementary Figure 2. Synthetic scheme of recomparin.** The components involved in PAPS regeneration system are boxed. AST-IV represents arylsulfotransferase IV, and PAP represents 3'-phosphoadenosine 5'-phosphate.

**Supplementary Figure 3**

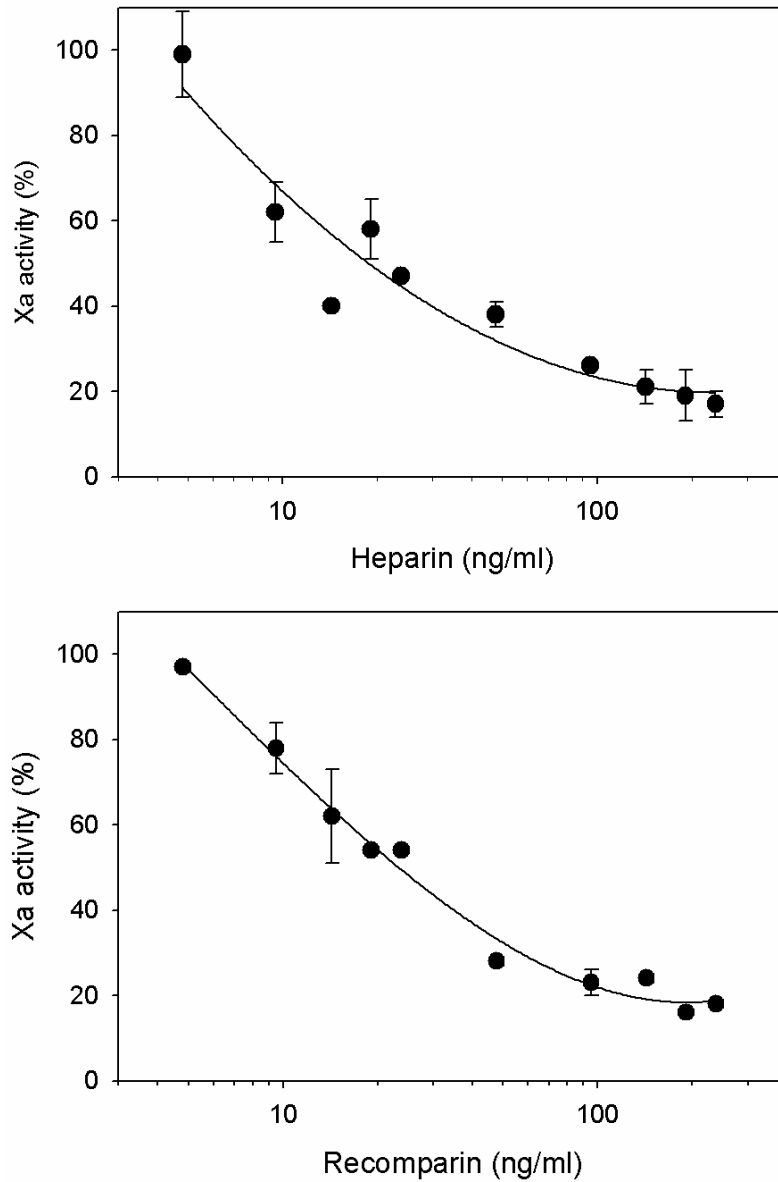

**Supplementary Figure 3. Inhibitory effects of heparin and recomparin on Xa activity.** Heparin and recomparin were incubated with AT (20  $\mu\text{g/ml}$ ), factor Xa (10 U/ml) and bovine serum albumin (100  $\mu\text{g/ml}$ ) in 20 mM sodium phosphate and 150 mM NaCl pH 7.2, and 1 mM S-2765 chromogenic Xa substrate. The activity of Xa was determined by the rate of the increase of the absorbance at 405 nm. The activity without polysaccharide was defined as 100%. Each data point represents the average of two determinations. Error bars indicate the range.
